# Supplementary material for: The identification of 14 new genes for meat quality traits in chicken using a genome-wide association study
Source: PubMed Central journal article supplement (PMC3707761; doi:10.1186/1471-2164-14-458), 2013-07-08

**A****DM<sub>Br</sub>**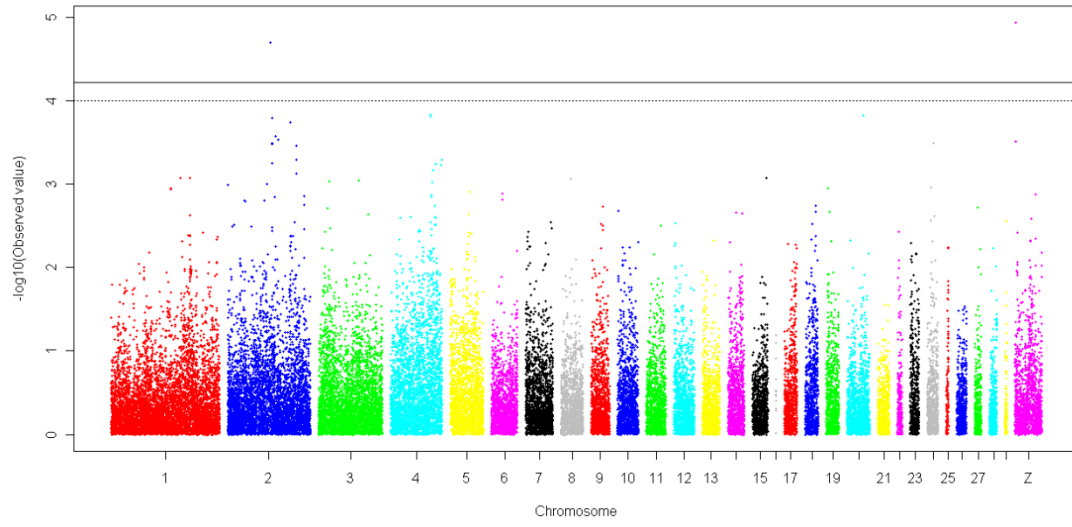**B****DM<sub>Th</sub>**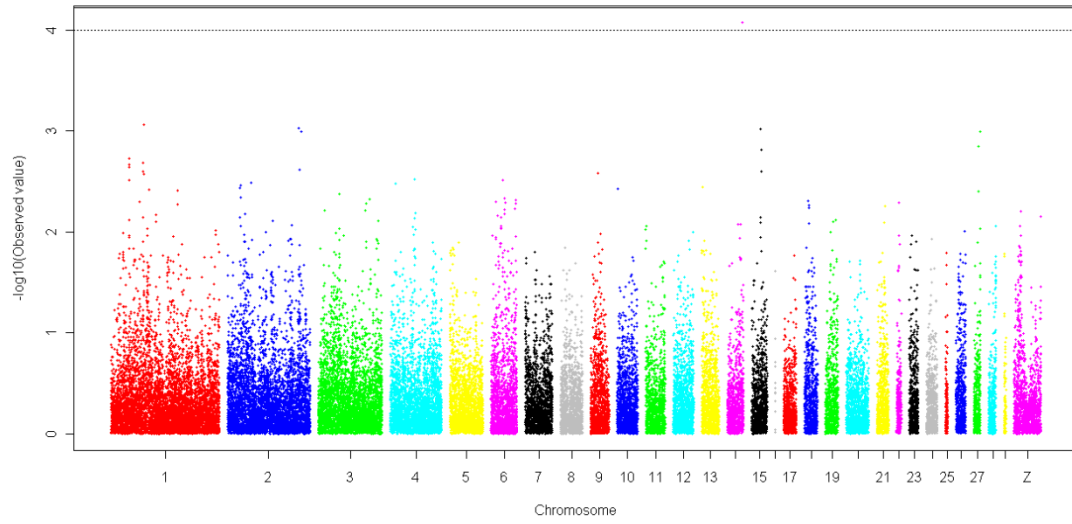**C****IMF<sub>Br</sub>**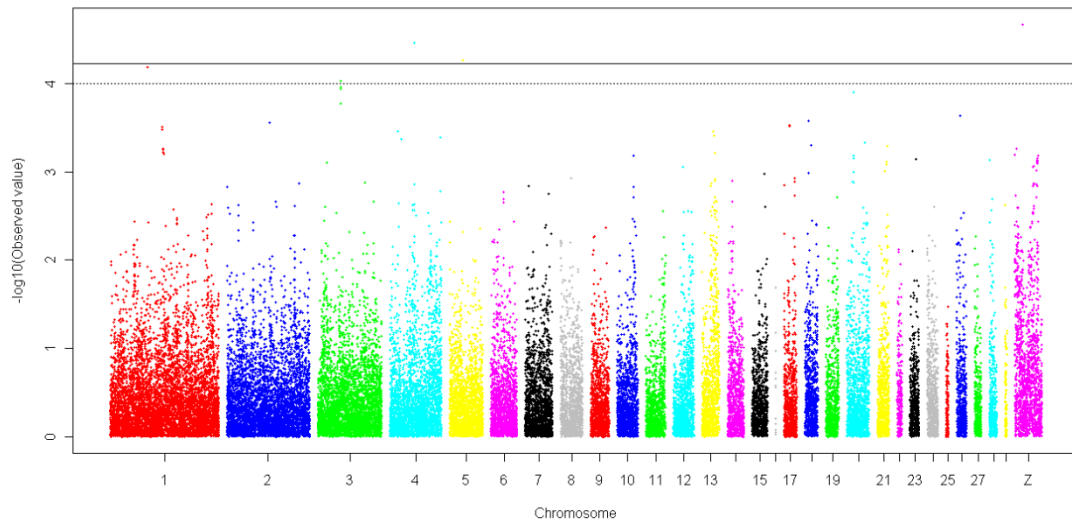

**D****IMF<sub>Th</sub>**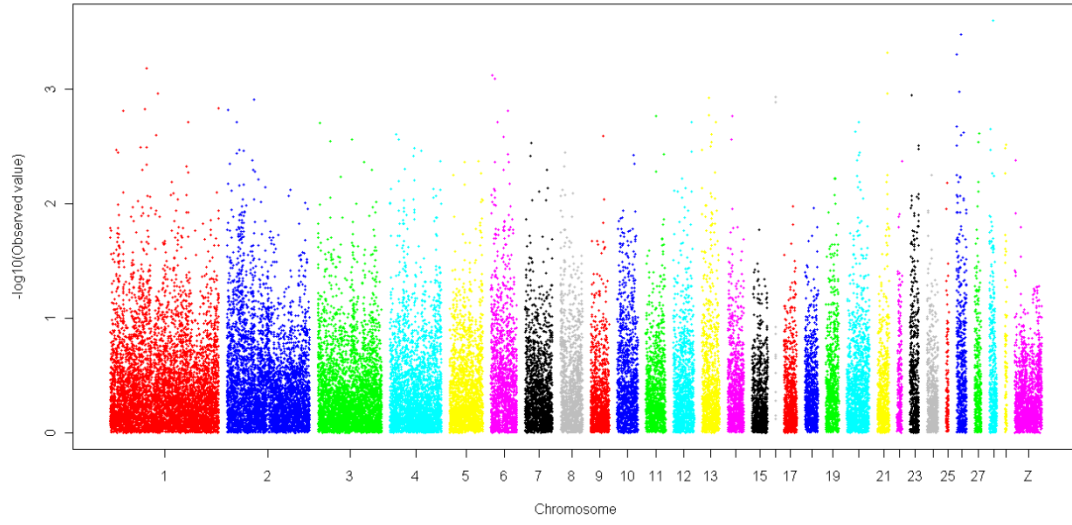**E****SFT**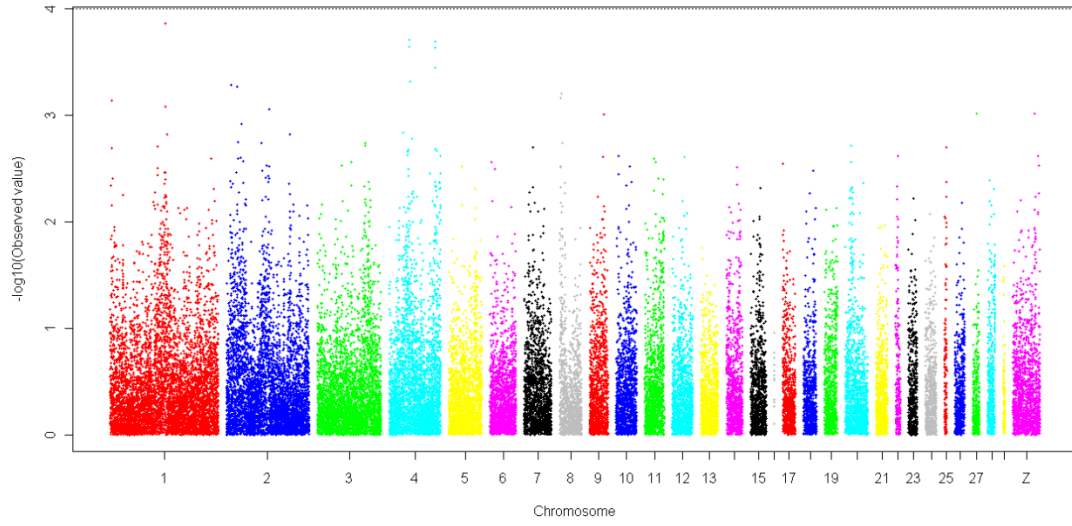**F****pHu**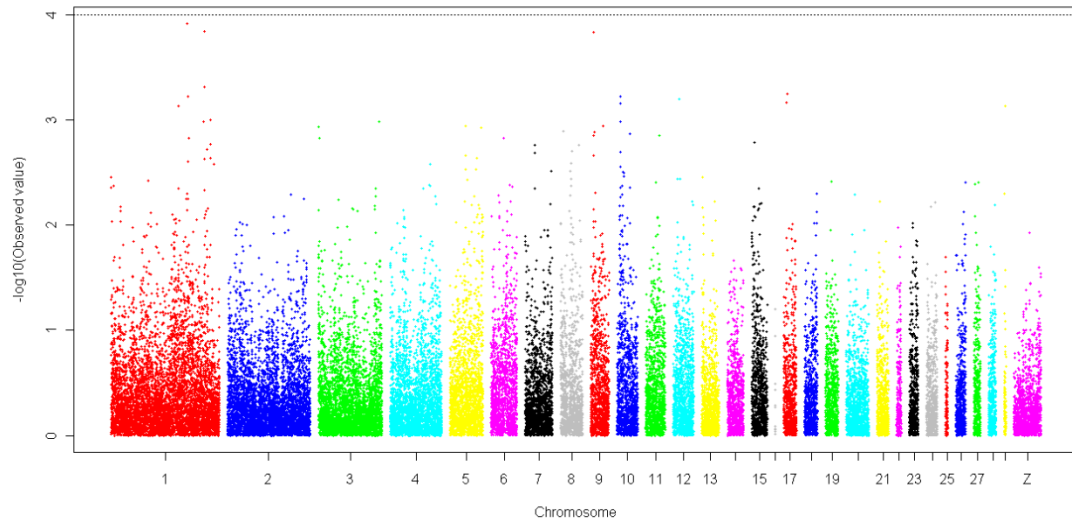

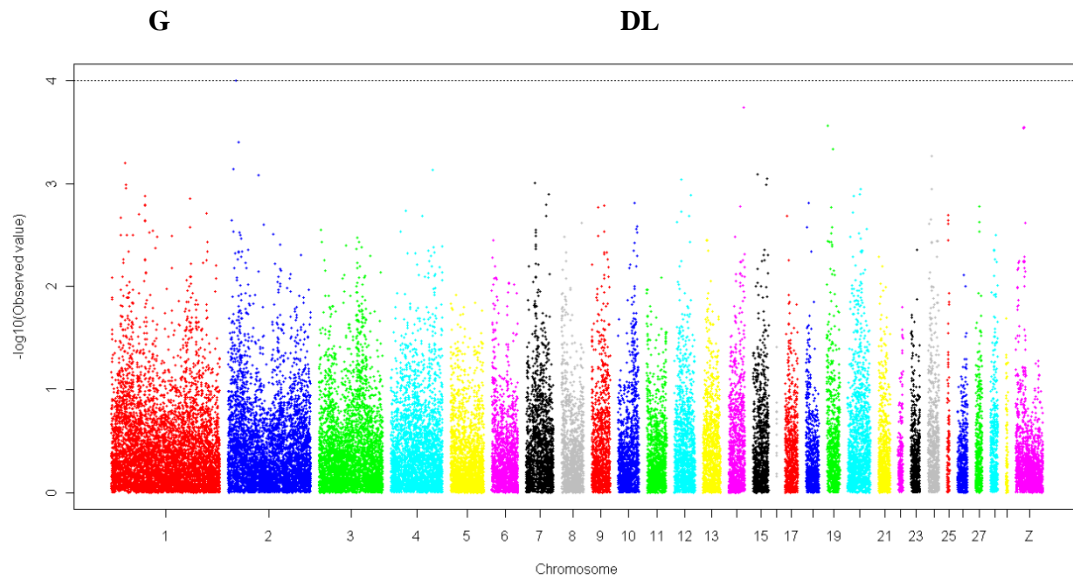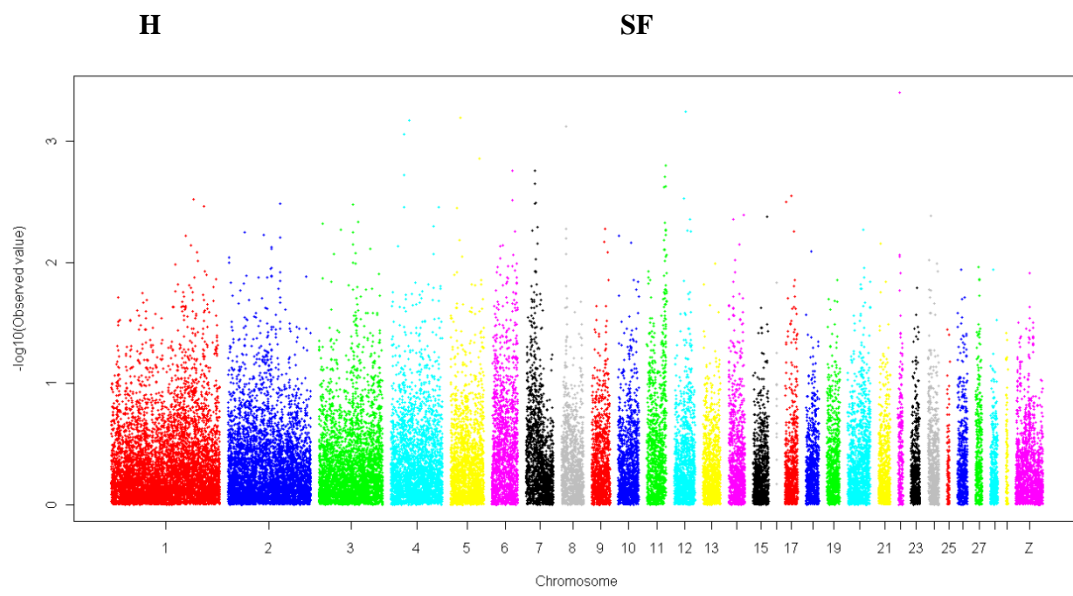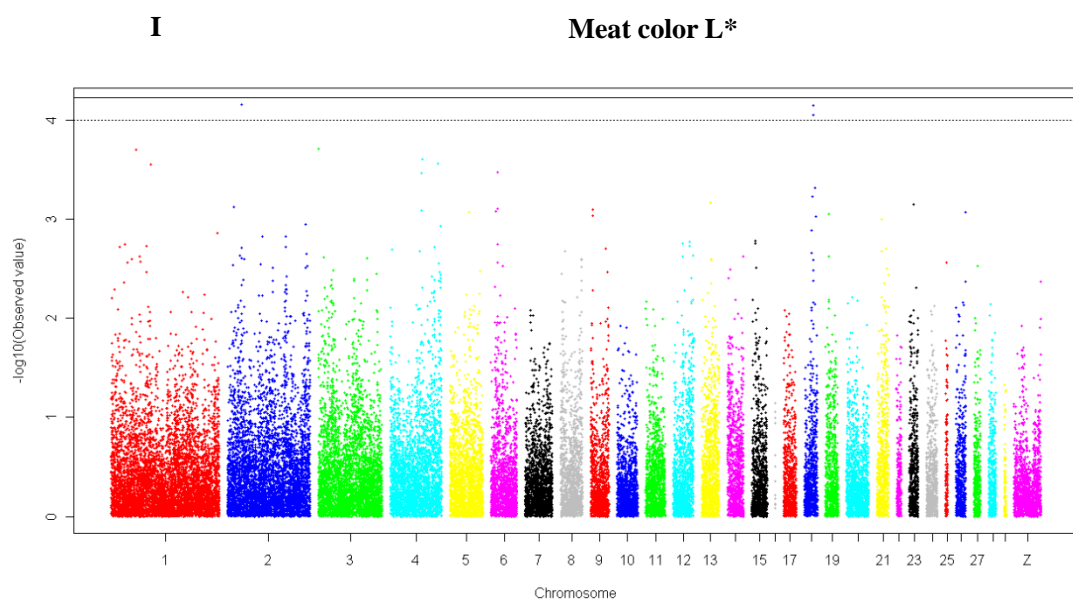

**J**

**Meat color a\***

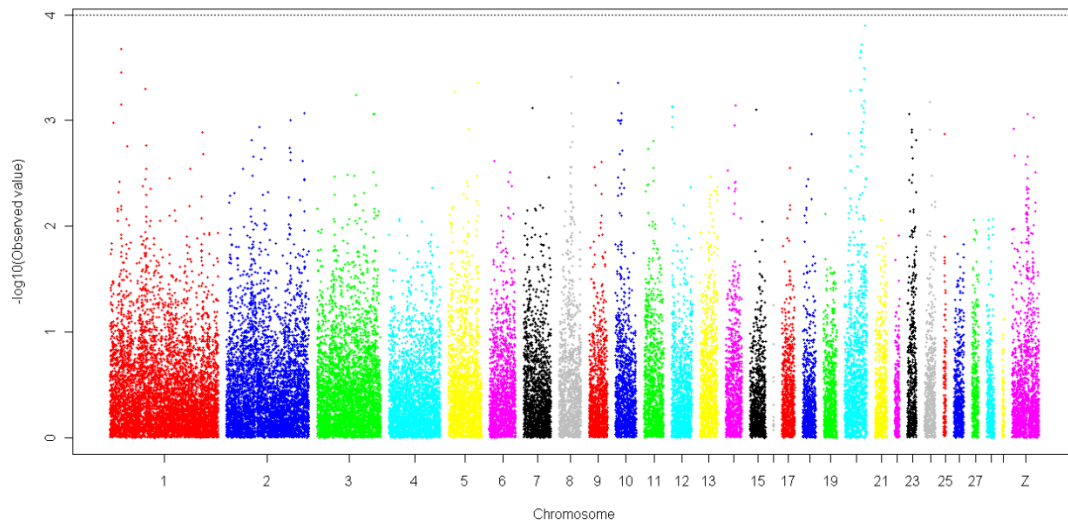

**K**

**Meat color b\***

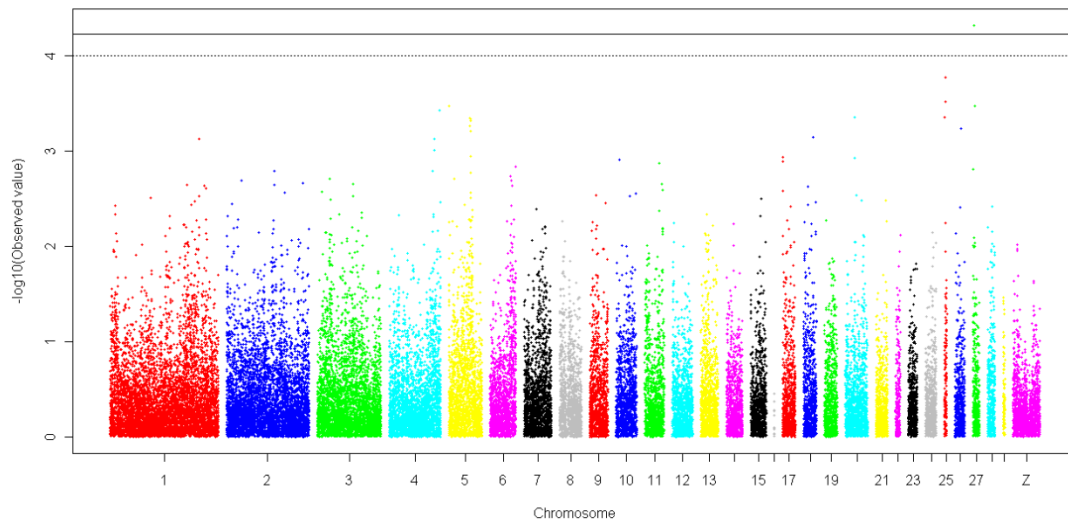

**L**

**Skin color L\***

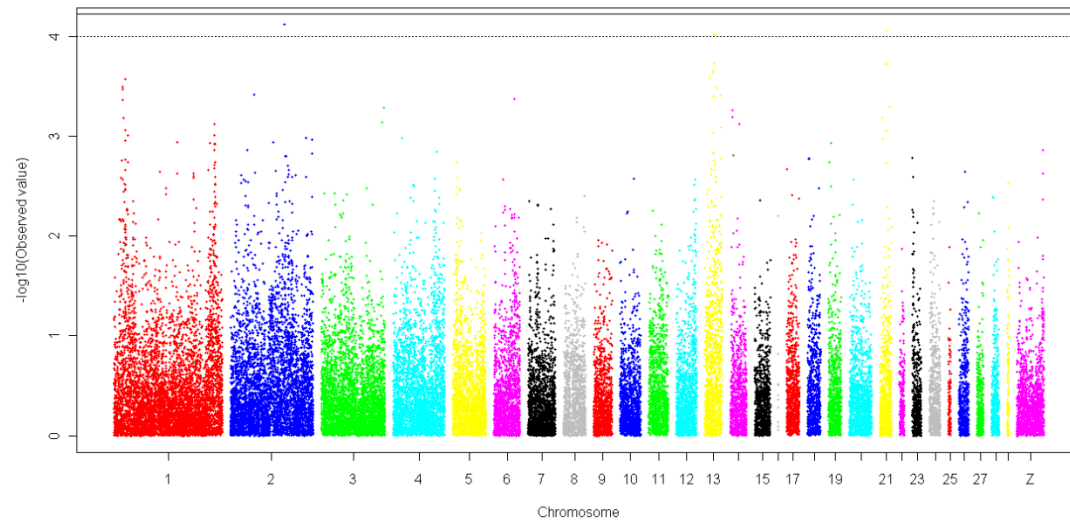

**M**

**Skin color a\***

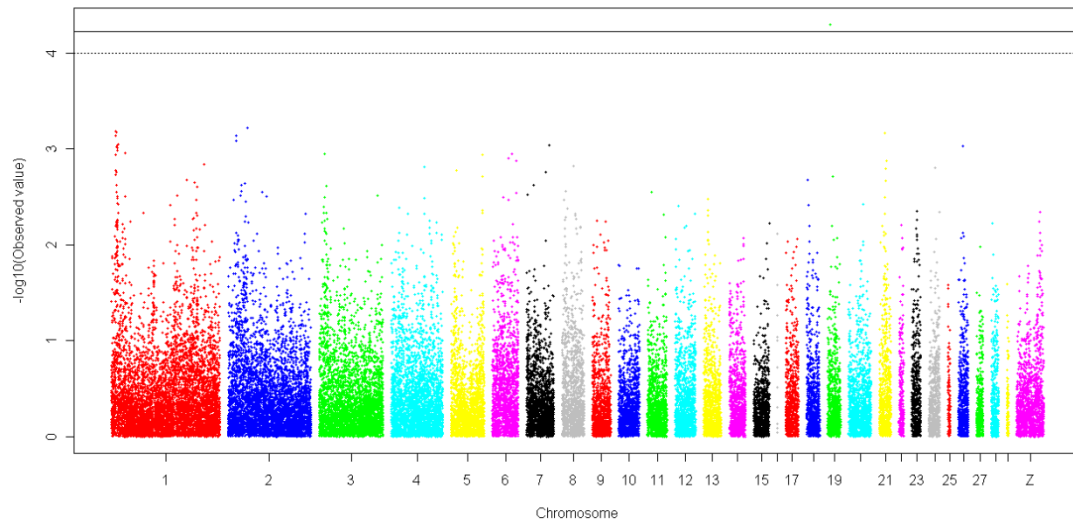

**N**

**Skin color b\***

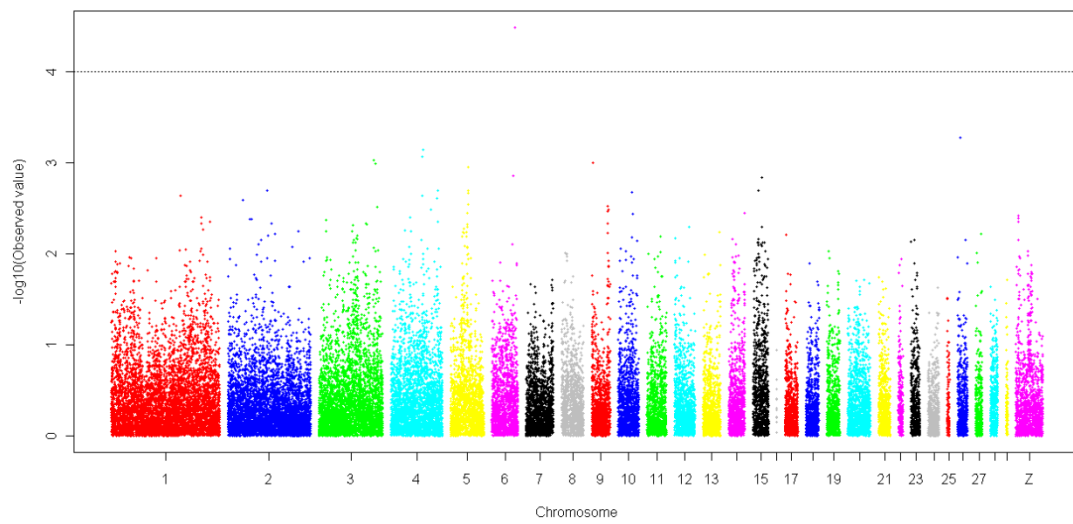

Supplement: 1471-2164-14-458-S1.pdf [file 1471-2164-14-458-S1.pdf]
